# Supplementary material
Source: PubMed Central journal article supplement (PMC545924)
Supplement: mbc_E04-05-0392_1.pdf [file mbc_E04-05-0392_1.pdf]

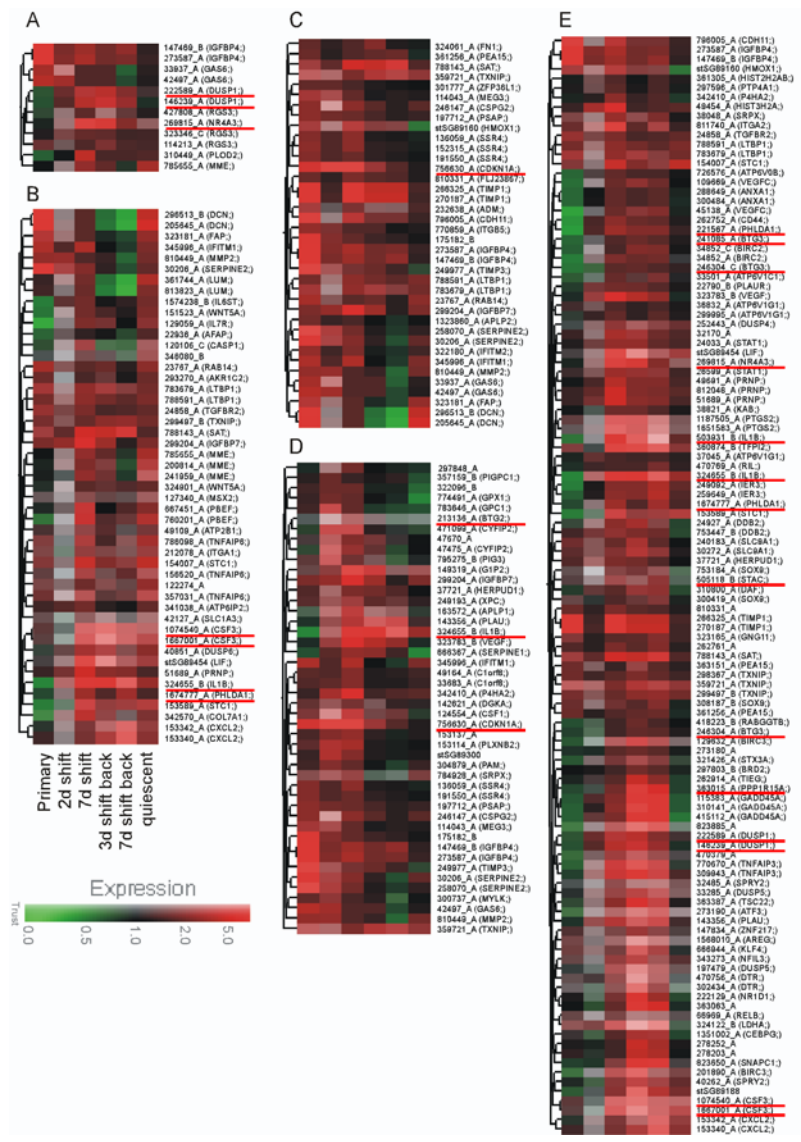

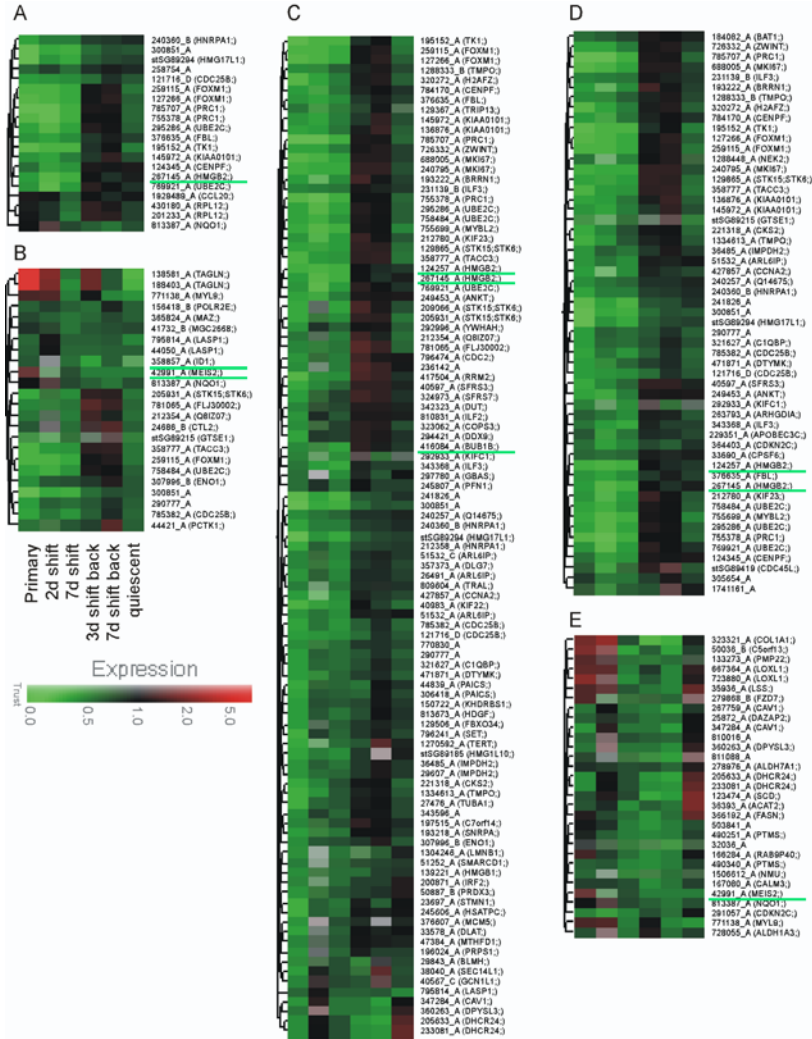

Sup Fig. 1: **A selection of the genes/clones significantly up-regulated after 7 days LT inactivation, compared to cells cultured at 33°C.** Clustered according to their expression in primary cells, quiescent cells, cells shifted for 2 days and cells shifted to 39°C for 7 days and then shifted back to 33°C (all compared directly to proliferating cells at 33°C). Genes are grouped according to whether they were also up-regulated in serially passaged primary cells (A), quiescence (B), after 2 days at 39°C (D), or when LT is re-activated for 7 days (E) or if they were down-regulated with immortalisation (C). Genes chosen for further analysis by western or RNAi are underlined.

Sup Fig. 2: **A selection of the genes/clones significantly down-regulated after 7 days LT inactivation, compared to cells cultured at 33°C.** Clustered according to their expression in primary cells, quiescent cells, cells shifted for 2 days and cells shifted to 39°C for 7 days and then shifted back to 33°C (all compared directly to proliferating cells at 33°C). Genes are grouped according to whether they were also down-regulated in serially passaged primary cells (A), quiescence (B), after 2 days at 39°C (D), or when LT is re-activated for 7 days (E) or if they were up-regulated with immortalisation (C). Genes chosen for further analysis by western blotting are underlined.
